# Supplementary material for: High Expression of PD-L1 Is Associated with Better Survival in Pancreatic/Periampullary Cancers and Correlates with Epithelial to Mesenchymal Transition
Source: Diagnostics (Basel). 2021 Mar 26;11(4):597. doi: 10.3390/diagnostics11040597 (PMC8065840; doi:10.3390/diagnostics11040597)
Supplement: Supplementary file 1 [file diagnostics-11-00597-s001.pdf]

Article

# High Expression of PD-L1 is Associated with Better Survival in Pancreatic/Periampullary Cancers and Correlates with Epithelial to Mesenchymal Transition

Supplementary Materials:

**Table S1.** Result of univariable cox proportional hazards regression analysis using death event as status variable and overall survival time as survival time

| Variable                | Subgroup                      | HR (95%CI)              | P value   |
|-------------------------|-------------------------------|-------------------------|-----------|
| Age                     |                               | 1.024 (0.992 - 1.056)   | 0.141     |
| Sex                     |                               |                         |           |
|                         | Female vs. Male               | 1.031 (0.607 - 1.752)   | 0.909     |
| Location                |                               |                         | < 0.001** |
|                         | Pancreatic Head vs. AOV       | 11.795 (4.649 - 29.925) | < 0.001** |
|                         | Distal CBD vs. AOV            | 3.609 (1.466 - 8.886)   | 0.005**   |
| T7                      |                               |                         | 1         |
|                         | T1 vs Tis                     | 7364538.688 (0 - Inf)   | 0.996     |
|                         | T2 vs. Tis                    | 5053164.568 (0 - Inf)   | 0.996     |
|                         | T3 vs. Tis                    | 19062328.45 (0 - Inf)   | 0.996     |
|                         | T4 vs. Tis                    | 24298595.997 (0 - Inf)  | 0.996     |
| T8                      |                               |                         | 1         |
|                         | T1 vs Tis                     | 7047555.234 (0 - Inf)   | 0.996     |
|                         | T2 vs. Tis                    | 8921396.166 (0 - Inf)   | 0.996     |
|                         | T3 vs. Tis                    | 13294799.292 (0 - Inf)  | 0.996     |
|                         | T4 vs. Tis                    | 18021584.76 (0 - Inf)   | 0.996     |
| Gross type              |                               |                         | 0.013*    |
|                         | Infiltrative vs. Fungative    | 4.156 (1.643 - 10.517)  | 0.003**   |
|                         | Ulcerofungative vs. Fungative | 0 (0 - Inf)             | 0.997     |
|                         | Sessile vs. Fungative         | 12.437 (2.872 - 53.858) | < 0.001** |
|                         | Solid vs. Fungative           | 0 (0 - Inf)             | 0.997     |
| Ulcer                   |                               |                         |           |
|                         | Present vs. Absent            | 0.613 (0.216 - 1.742)   | 0.358     |
| Size                    |                               | 1.336 (1.125 - 1.587)   | < 0.001** |
| Size_4.5 cm             |                               |                         |           |
|                         | ≥4.5 cm vs. <4.5 cm           | 1.876 (1.056 - 3.332)   | 0.032*    |
| Radial resection margin |                               |                         |           |
|                         | Present vs. Absent            | 2.177 (0.85 - 5.571)    | 0.105     |
| N1                      |                               | 1.425 (1.25 - 1.626)    | < 0.001** |

|                        |                                                                       |                        |           |
|------------------------|-----------------------------------------------------------------------|------------------------|-----------|
| N2                     |                                                                       | 1.001 (0.965 - 1.037)  | 0.967     |
| N stage                |                                                                       |                        |           |
|                        | N1 vs. N0                                                             | 4.005 (2.304 - 6.961)  | < 0.001** |
| M stage                |                                                                       |                        |           |
|                        | M1 vs. M0                                                             | 4.142 (1.919 - 8.936)  | < 0.001** |
| Lymphatic invasion     |                                                                       |                        |           |
|                        | Present vs. Absent                                                    | 3.915 (2.243 - 6.836)  | < 0.001** |
| Perineural invasion    |                                                                       |                        |           |
|                        | Present vs. Absent                                                    | 2.915 (1.62 - 5.246)   | < 0.001** |
| Vascular invasion      |                                                                       |                        |           |
|                        | Present vs. Absent                                                    | 3.088 (1.419 - 6.718)  | 0.004**   |
| Histologic grade       |                                                                       |                        | 0.01**    |
|                        | Moderate vs. Well                                                     | 2.603 (1.327 - 5.104)  | 0.005**   |
|                        | Poorly vs. Well                                                       | 4.601 (1.245 - 17.004) | 0.022*    |
| Fibrosis               |                                                                       |                        | 1         |
|                        | Mild vs. None                                                         | 11804768.899 (0 - Inf) | 0.996     |
|                        | Moderate vs. None                                                     | 28264925.781 (0 - Inf) | 0.996     |
|                        | Severe vs. None                                                       | 56880557.21 (0 - Inf)  | 0.996     |
| Degree of Inflammation |                                                                       |                        | 0.072     |
|                        |                                                                       |                        |           |
|                        | Moderate vs. Mild                                                     | 0.619 (0.347 - 1.106)  | 0.105     |
|                        | Severe vs. Mild                                                       | 0.311 (0.105 - 0.927)  | 0.036*    |
| Histologic subtype     |                                                                       |                        | 0.004**   |
|                        | Prone to Pancreaticobiliary subtype<br>vs. Pancreaticobiliary subtype | 0.519 (0.291 - 0.926)  | 0.026*    |
|                        | Prone to Intestinal subtype vs. Pancre-<br>aticobiliary subtype       | 0.287 (0.108 - 0.762)  | 0.012*    |
|                        | Intestinal vs. Pancreaticobiliary sub-<br>type                        | 0.174 (0.052 - 0.583)  | 0.005**   |
| CK7                    |                                                                       |                        | 0.177     |
|                        | 1+ vs. 0                                                              | 2.303 (0.383 - 13.838) | 0.362     |
|                        | 2+ vs. 0                                                              | 3.474 (0.797 - 15.139) | 0.097     |
|                        | 3 +vs. 0                                                              | 4.298 (1.031 - 17.914) | 0.045*    |
| CK20                   |                                                                       |                        | 0.039*    |
|                        | 1+ vs. 0                                                              | 0.523 (0.244 - 1.122)  | 0.096     |
|                        | 2+ vs. 0                                                              | 0.379 (0.149 - 0.965)  | 0.042*    |
|                        | 3+ vs. 0                                                              | 0.335 (0.103 - 1.088)  | 0.069     |
| CDX2                   |                                                                       |                        | 0.002**   |
|                        | 1+ vs. 0                                                              | 0.64 (0.35 - 1.169)    | 0.147     |
|                        | 2+ vs. 0                                                              | 0.353 (0.157 - 0.794)  | 0.012*    |
|                        | 3+vs. 0                                                               | 0.186 (0.07 - 0.489)   | < 0.001** |
| IGF1                   |                                                                       |                        | 0.439     |

|      |        |                          |                       |                |
|------|--------|--------------------------|-----------------------|----------------|
| FGFR |        | 1+ vs. 0                 | 1.098 (0.43 - 2.809)  | 0.845          |
|      |        | 2+ vs. 0                 | 0.645 (0.222 - 1.88)  | 0.422          |
|      |        | 3+ vs. 0                 | 0.686 (0.181 - 2.599) | 0.579          |
|      |        |                          |                       | <b>0.003**</b> |
|      |        | 2+ vs. 1+                | 0.268 (0.089 - 0.808) | <b>0.019*</b>  |
|      |        | 3+ vs. 1+                | 0.154 (0.05 - 0.473)  | <b>0.001**</b> |
| VEGF |        |                          |                       | <b>0.037*</b>  |
|      |        | 2+ vs. 1+                | 0.407 (0.198 - 0.837) | <b>0.015*</b>  |
|      |        | 3+ vs. 1+                | 0.385 (0.166 - 0.894) | <b>0.026*</b>  |
| PD1  | Score  |                          |                       | 0.734          |
|      |        | 1+ vs. 0                 | 0.998 (0.426 - 2.34)  | 0.997          |
|      |        | 2+ vs. 0                 | 0.563 (0.134 - 2.359) | 0.432          |
| PDL1 | Score  |                          |                       | 0.648          |
|      |        | (1+ or 2+) vs. 0         | 0.839 (0.395 - 1.781) | 0.648          |
|      | Score1 |                          |                       | 0.118          |
|      |        | 2+ vs. 1+                | 0.759 (0.328 - 1.757) | 0.519          |
|      |        | 3+ vs. 1+                | 0.469 (0.2 - 1.101)   | 0.082          |
|      | Score1 |                          |                       | 0.052          |
|      |        | 3+ vs. (1+ or 2+)        | 0.586 (0.342 - 1.005) | 0.052          |
|      | Score2 |                          |                       | <b>0.012*</b>  |
|      |        | 2+ vs. 1+                | 0.925 (0.481 - 1.776) | 0.814          |
|      |        | 3+ vs. 1+                | 0.4 (0.199 - 0.805)   | <b>0.010*</b>  |
| PDL2 | Score2 |                          |                       |                |
|      |        | 3+ vs. (1+ or 2+)        | 0.42 (0.237 - 0.745)  | <b>0.003**</b> |
|      |        |                          |                       | 0.450          |
|      | Score1 | 1+ vs. 0                 | 0.688 (0.133 - 3.563) | 0.656          |
|      |        | 2+ vs. 0                 | 1.116 (0.258 - 4.827) | 0.883          |
|      |        | 3+ vs. 0                 | 0.701 (0.167 - 2.945) | 0.628          |
|      | Score1 |                          |                       | 0.292          |
|      |        | 2+ vs. (0 or 1+)         | 1.478 (0.617 - 3.541) | 0.381          |
|      |        | 3+ vs. (0 or 1+)         | 0.928 (0.407 - 2.118) | 0.859          |
|      | Score1 |                          |                       | 0.214          |
|      |        | 3+ vs. (0 or 1+ or 2+)   | 0.712 (0.417 - 1.216) | 0.214          |
|      |        |                          |                       | 0.846          |
|      | Score1 | (2+ or 3+) vs. (0 or 1+) | 1.082 (0.489 - 2.395) | 0.846          |
|      |        |                          |                       | 0.262          |
|      |        |                          |                       |                |
|      | Score2 | 1+ vs. 0                 | 1.497 (0.599 - 3.738) | 0.388          |
|      |        | 2+ vs. 0                 | 1.391 (0.556 - 3.478) | 0.481          |
|      |        | 3+ vs. 0                 | 0.728 (0.261 - 2.033) | 0.545          |
|      | Score2 |                          |                       | 0.643          |
|      |        | (1+ or 2+ or 3+) vs. 0   | 1.223 (0.522 - 2.87)  | 0.643          |

|        |                  |                       |       |
|--------|------------------|-----------------------|-------|
| Score2 |                  |                       | 0.140 |
|        | (1+ or 2+) vs. 0 | 1.442 (0.609 - 3.414) | 0.405 |
|        | 3+ vs. 0         | 0.728 (0.261 - 2.032) | 0.544 |

HR: hazard ratio, Significant values ( $P < 0.05$ ) have been marked with bold.

**Table S2.** Result of multivariable cox proportional hazards regression analysis using death event as response and overall survival time as the time variable.

| Variable(response=Death Event) | Subgroup                | HR (95%CI)             | P-value             |
|--------------------------------|-------------------------|------------------------|---------------------|
| Location                       |                         |                        | <b>&lt; 0.001**</b> |
|                                | Pancreatic head vs. AOV | 7.355 (2.713 - 19.943) | <b>&lt; 0.001**</b> |
|                                | Distal CBD vs. AOV      | 2.855 (1.115 - 7.313)  | <b>0.029*</b>       |
| N stage                        |                         |                        | <b>0.001**</b>      |
|                                | N1 vs. N0               | 2.887 (1.531 - 5.445)  | <b>0.001**</b>      |
| M stage                        |                         |                        | <b>0.004**</b>      |
|                                | M1 vs. M0               | 3.488 (1.479 - 8.226)  | <b>0.004**</b>      |
| FGFR                           |                         |                        | <b>0.004**</b>      |
|                                | 2+ vs. 1+               | 0.191 (0.06 - 0.611)   | <b>0.005**</b>      |
|                                | 3+ vs. 1+               | 0.128 (0.038 - 0.428)  | <b>&lt; 0.001**</b> |
| PDL1 Score2                    |                         |                        |                     |
|                                | 3+ vs. (1+ or 2+)       | 0.48 (0.259 - 0.887)   | <b>0.019*</b>       |

HR: hazard ratio, Significant values ( $P < 0.05$ ) have been marked with bold.

**Table S3.** Result of univariable cox proportional hazards regression analysis using recurrence event as status variable and Disease-free survival time as survival time.

| Variable | Subgroup                | HR (95%CI)             | P-value        |
|----------|-------------------------|------------------------|----------------|
| Age      |                         | 1.034 (1.001 - 1.069)  | <b>0.042*</b>  |
| Sex      |                         |                        |                |
|          | Female vs. Male         | 0.964 (0.554 - 1.679)  | 0.898          |
| Location |                         |                        | <b>0.008**</b> |
|          | Pancreatic head vs. AOV | 3.372 (1.556 - 7.31)   | <b>0.002**</b> |
|          | Distal CBD vs. AOV      | 1.82 (0.882 - 3.758)   | 0.105          |
| T7       |                         |                        | 1              |
|          | T1 vs. Tis              | 6267620.358 (0 - Inf)  | 0.996          |
|          | T2 vs. Tis              | 7587718.783 (0 - Inf)  | 0.996          |
|          | T3 vs. Tis              | 14571449.458 (0 - Inf) | 0.996          |
|          | T4 vs. Tis              | 10132566.792 (0 - Inf) | 0.996          |
| T8       |                         |                        | 1              |

|                         |                                                                |                        |                     |
|-------------------------|----------------------------------------------------------------|------------------------|---------------------|
|                         | T1 vs. Tis                                                     | 6623316.928 (0 - Inf)  | 0.996               |
|                         | T2 vs. Tis                                                     | 9328025.227 (0 - Inf)  | 0.996               |
|                         | T3 vs. Tis                                                     | 13466073.961 (0 - Inf) | 0.996               |
|                         | T4 vs. Tis                                                     | 11480091.662 (0 - Inf) | 0.996               |
| Gross type              |                                                                |                        | 0.994               |
|                         | Infiltrative vs. Fungative                                     | 2.157 (1.003 - 4.639)  | <b>0.049*</b>       |
|                         | Ulcerofungative vs. Fungative                                  | 1.046 (0.13 - 8.383)   | 0.966               |
|                         | Sessile vs. Fungative                                          | 1.52 (0.187 - 12.343)  | 0.695               |
|                         | Solid vs. Fungative                                            | 0 (0 - Inf)            | 0.996               |
| Ulcer                   |                                                                |                        |                     |
|                         | Present vs. Absent                                             | 0.976 (0.378 - 2.52)   | 0.961               |
| Size                    |                                                                | 1.265 (1.06 - 1.509)   | <b>0.009**</b>      |
| Size_4.5 cm             |                                                                |                        |                     |
|                         | ≥4.5 cm vs. <4.5 cm                                            | 1.836 (1.004 - 3.357)  | <b>0.049*</b>       |
| Radial resection margin |                                                                |                        |                     |
|                         | Present vs. Absent                                             | 1.896 (0.678 - 5.301)  | 0.223               |
| N1                      |                                                                | 1.278 (1.111 - 1.471)  | <b>&lt; 0.001**</b> |
| N2                      |                                                                | 1.004 (0.967 - 1.042)  | 0.848               |
| N stage                 |                                                                |                        |                     |
|                         | N1 vs. N0                                                      | 2.563 (1.455 - 4.516)  | <b>0.001**</b>      |
| M stage                 |                                                                |                        |                     |
|                         | M1 vs. M0                                                      | 0.314 (0.043 - 2.283)  | 0.253               |
| Lymphatic invasion      |                                                                |                        |                     |
|                         | Present vs. Absent                                             | 2.998 (1.701 - 5.284)  | <b>&lt; 0.001**</b> |
| Perineural invasion     |                                                                |                        |                     |
|                         | Present vs. Absent                                             | 1.727 (0.981 - 3.041)  | 0.058               |
| Vascular invasion       |                                                                |                        |                     |
|                         | Present vs. Absent                                             | 1.726 (0.728 - 4.092)  | 0.215               |
| Histologic grade        |                                                                |                        | <b>0.003**</b>      |
|                         | Moderate vs. Well                                              | 1.967 (1.016 - 3.809)  | <b>0.045*</b>       |
|                         | Poorly vs. Well                                                | 7.425 (2.287 - 24.107) | <b>&lt; 0.001**</b> |
| Degree of Fibrosis      |                                                                |                        | 1                   |
|                         | Mild vs. None                                                  | 23201558.334 (0 - Inf) | 0.996               |
|                         | Moderate vs. None                                              | 23674351.857 (0 - Inf) | 0.996               |
|                         | Severe vs. None                                                | 58119540.116 (0 - Inf) | 0.996               |
| Degree of inflammation  |                                                                |                        | 0.807               |
|                         | Moderate vs. Mild                                              | 0.892 (0.474 - 1.678)  | 0.722               |
|                         | Severe vs. Mild                                                | 0.726 (0.277 - 1.9)    | 0.514               |
| Histologic subtype      |                                                                |                        | 0.109               |
|                         | Prone topancreaticobiliary vs. Pancre-<br>aticobiliary subtype | 0.666 (0.358 - 1.242)  | 0.201               |

|      |        |                                                            |                        |                |
|------|--------|------------------------------------------------------------|------------------------|----------------|
|      |        | Prone to intestinal subtype vs. Pancreaticobiliary subtype | 0.456 (0.178 - 1.167)  | 0.102          |
|      |        | Intestinal subtype vs. Pancreaticobiliary subtype          | 0.299 (0.1 - 0.893)    | <b>0.031*</b>  |
| CK7  |        |                                                            |                        | 0.387          |
|      |        | 1+ vs. 0                                                   | 2.614 (0.477 - 14.326) | 0.268          |
|      |        | 2+ vs. 0                                                   | 3.346 (0.768 - 14.569) | 0.108          |
|      |        | 3+ vs. 0                                                   | 3.426 (0.817 - 14.375) | 0.092          |
| CK20 |        |                                                            |                        | 0.395          |
|      |        | 1+ vs. 0                                                   | 0.533 (0.235 - 1.21)   | 0.133          |
|      |        | 2+ vs. 0                                                   | 0.683 (0.3 - 1.554)    | 0.363          |
|      |        | 3+ vs. 0                                                   | 0.664 (0.257 - 1.713)  | 0.397          |
| CDX2 |        |                                                            |                        | <b>0.035*</b>  |
|      |        | 1+ vs. 0                                                   | 1.033 (0.544 - 1.961)  | 0.921          |
|      |        | 2+ vs. 0                                                   | 0.534 (0.228 - 1.256)  | 0.151          |
|      |        | 3+ vs. 0                                                   | 0.313 (0.122 - 0.799)  | <b>0.015*</b>  |
| IGF1 |        |                                                            |                        | 0.256          |
|      |        | 1+ vs. 0                                                   | 0.938 (0.393 - 2.241)  | 0.886          |
|      |        | 2+ vs. 0                                                   | 0.48 (0.169 - 1.362)   | 0.168          |
|      |        | 3+ vs. 0                                                   | 0.488 (0.12 - 1.989)   | 0.317          |
| FGFR |        |                                                            |                        | <b>0.01*</b>   |
|      |        | 2+ vs. 1+                                                  | 0.445 (0.151 - 1.314)  | 0.143          |
|      |        | 3+ vs. 1+                                                  | 0.227 (0.075 - 0.689)  | <b>0.009**</b> |
| VEGF |        |                                                            |                        | 0.199          |
|      |        | 2+ vs. 1+                                                  | 0.536 (0.252 - 1.139)  | 0.105          |
|      |        | 3+ vs. 1+                                                  | 0.473 (0.196 - 1.142)  | 0.096          |
| PD1  | Score  |                                                            |                        | 0.549          |
|      |        | 1+ vs. 0                                                   | 0.623 (0.224 - 1.732)  | 0.364          |
|      |        | 2+ vs. 0                                                   | 0.616 (0.147 - 2.586)  | 0.508          |
|      | Score  |                                                            |                        |                |
|      |        | (1+ or 2+) vs. 0                                           | 0.621 (0.264 - 1.457)  | 0.273          |
| PDL1 | Score1 |                                                            |                        | 0.303          |
|      |        | 2+ vs. 1+                                                  | 0.88 (0.336 - 2.307)   | 0.795          |
|      |        | 3+ vs. 1+                                                  | 0.583 (0.219 - 1.551)  | 0.280          |
|      | Score1 |                                                            |                        |                |
|      |        | 3+ vs. (1+ or 2+)                                          | 0.649 (0.372 - 1.133)  | 0.129          |
|      | Score2 |                                                            |                        | <b>0.032*</b>  |
|      |        | 2+ vs. 1+                                                  | 0.847 (0.43 - 1.669)   | 0.632          |
|      |        | 3+ vs. +1                                                  | 0.417 (0.203 - 0.855)  | <b>0.017*</b>  |
|      | Score2 |                                                            |                        |                |
|      |        | 3+ vs. (1+ or 2+)                                          | 0.462 (0.256 - 0.833)  | <b>0.010*</b>  |
| PDL2 | Score1 |                                                            |                        | 0.336          |

|        |                          |                       |       |
|--------|--------------------------|-----------------------|-------|
|        | 1+ vs. 0                 | 0.506 (0.126 - 2.03)  | 0.336 |
|        | 2+ vs. 0                 | 0.685 (0.2 - 2.344)   | 0.546 |
|        | 3+ vs. 0                 | 0.429 (0.129 - 1.428) | 0.168 |
| Score1 |                          |                       | 0.310 |
|        | 2+ vs. (0 or 1+)         | 1.131 (0.503 - 2.539) | 0.766 |
|        | 3+ vs. (0 or 1+)         | 0.709 (0.331 - 1.521) | 0.377 |
| Score1 |                          |                       |       |
|        | 3+ vs. (0 or 1+ or 2+)   | 0.656 (0.378 - 1.14)  | 0.135 |
| Score1 |                          |                       |       |
|        | (2+ or 3+) vs. (0 or 1+) | 0.837 (0.407 - 1.719) | 0.627 |
| Score2 |                          |                       | 0.181 |
|        | 1+ vs. 0                 | 1.259 (0.55 - 2.884)  | 0.585 |
|        | 2+ vs. 0                 | 1.168 (0.506 - 2.698) | 0.716 |
|        | 3+ vs. 0                 | 0.487 (0.174 - 1.362) | 0.171 |
| Score2 |                          |                       |       |
|        | (1+ or 2+ or 3+) vs. 0   | 0.996 (0.466 - 2.126) | 0.991 |
| Score2 |                          |                       | 0.090 |
|        | (1+ or 2+) vs. 0         | 1.214 (0.563 - 2.614) | 0.621 |
|        | 3+ vs. 0                 | 0.487 (0.174 - 1.362) | 0.170 |

HR: hazard ratio, Significant values ( $P < 0.05$ ) have been marked with bold.

**Table S4.** Result of multivariable cox proportional hazards regression analysis using recurrence event as response and Disease-free survival time as the time variable.

| Variable           | Subgroup          | HR (95%CI)            | P-value             |
|--------------------|-------------------|-----------------------|---------------------|
| Age                |                   | 1.046 (1.011 - 1.083) | <b>0.01*</b>        |
| Lymphatic invasion |                   |                       |                     |
|                    | Present vs. Absen | 3.289 (1.838 - 5.884) | <b>&lt; 0.001**</b> |
| PDL1 Score2        |                   |                       |                     |
|                    | 3+ vs. (1+ or 2+) | 0.474 (0.262 - 0.86)  | <b>0.014*</b>       |

HR: hazard ratio, Significant values ( $P < 0.05$ ) have been marked with bold.

Figure S1.

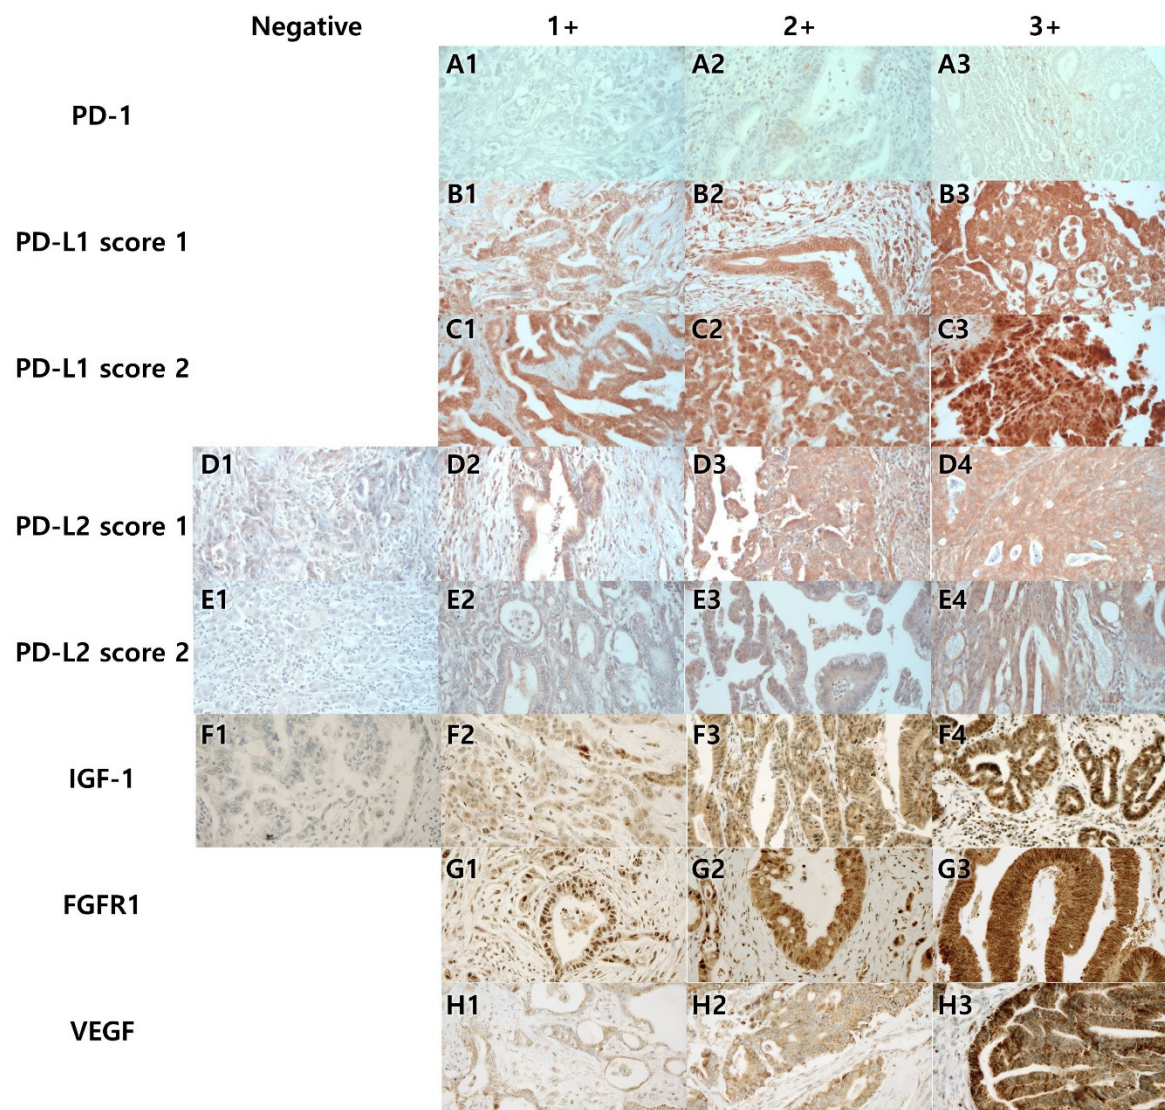

**Figure S1.** Representative images of the immunohistochemical stainings using the tissue microarray of perianapillary/perianapillary cancers (x400). (A) PD-1, (B) PD-L1 score 1 and (C) score 2, (D) PD-L2 score 1 and (E) score 2, (F) IGF-1 (G) FGFR1, and (H) VEGF, with negative (no expression), 1+ (low expression), 2+ (moderate expression) and 3+ (high expression) intensity.

Figure S2

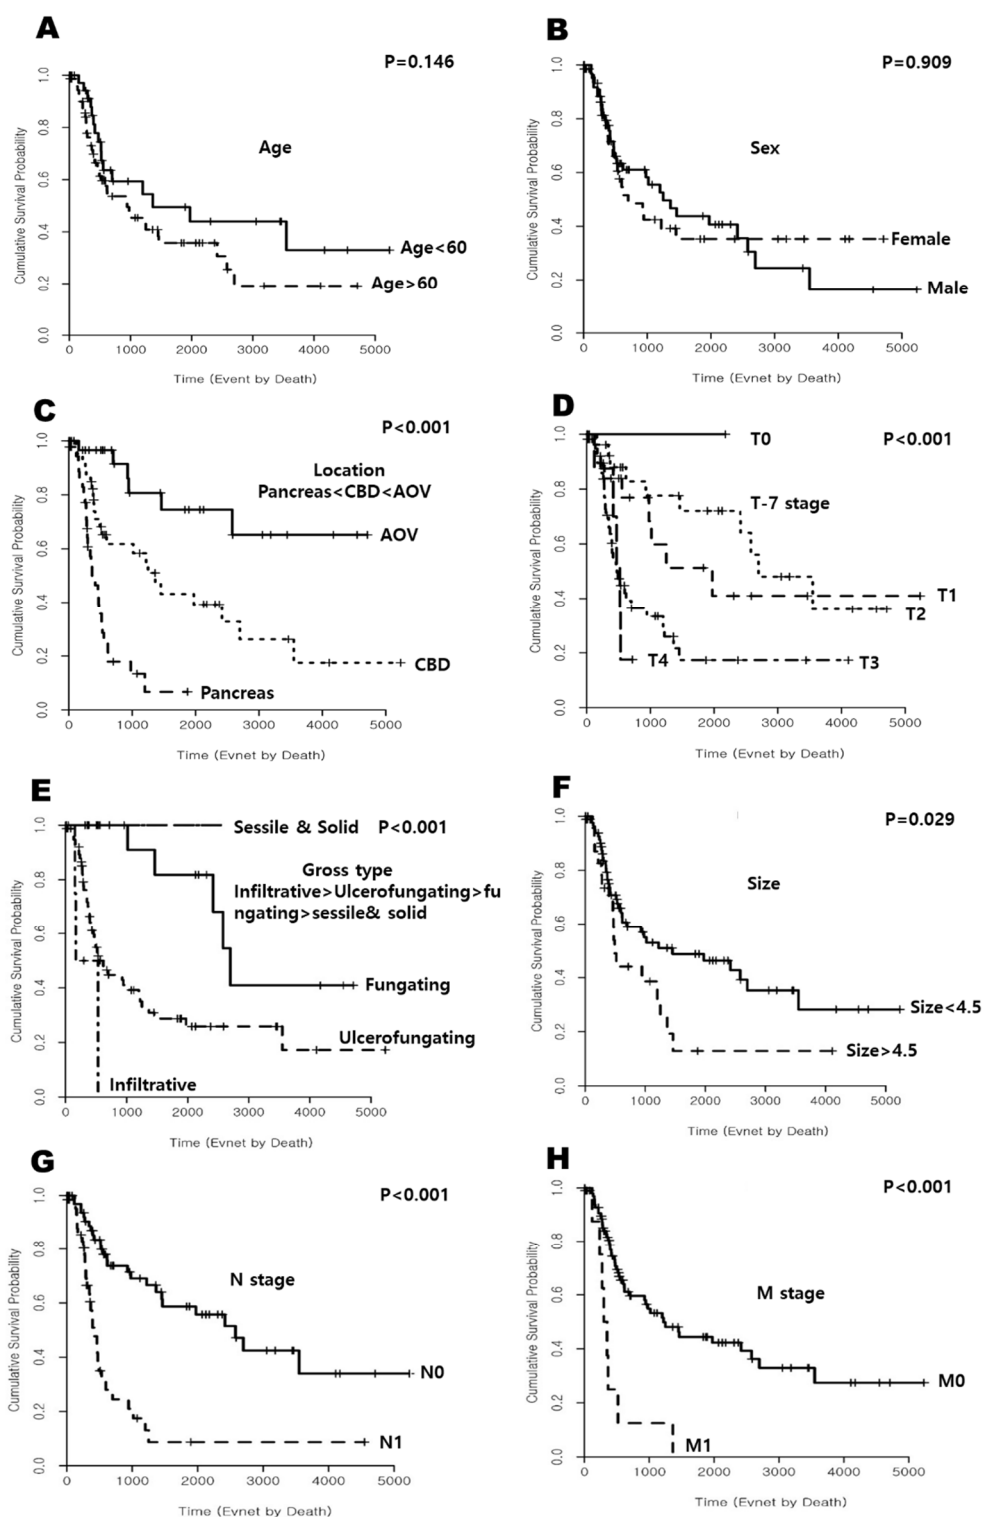

**Figure S2.** Kaplan-Meier plots on the relationship between overall survival and clinical parameters in periampullary/pancreatic cancer patients. No significant relationship found according to (A) age and (B) sex, whereas there was significant difference according to (C) location, (D) T stage, (E) gross type, (F) size, (G) N stage, and (H) M stage

Figure S3.

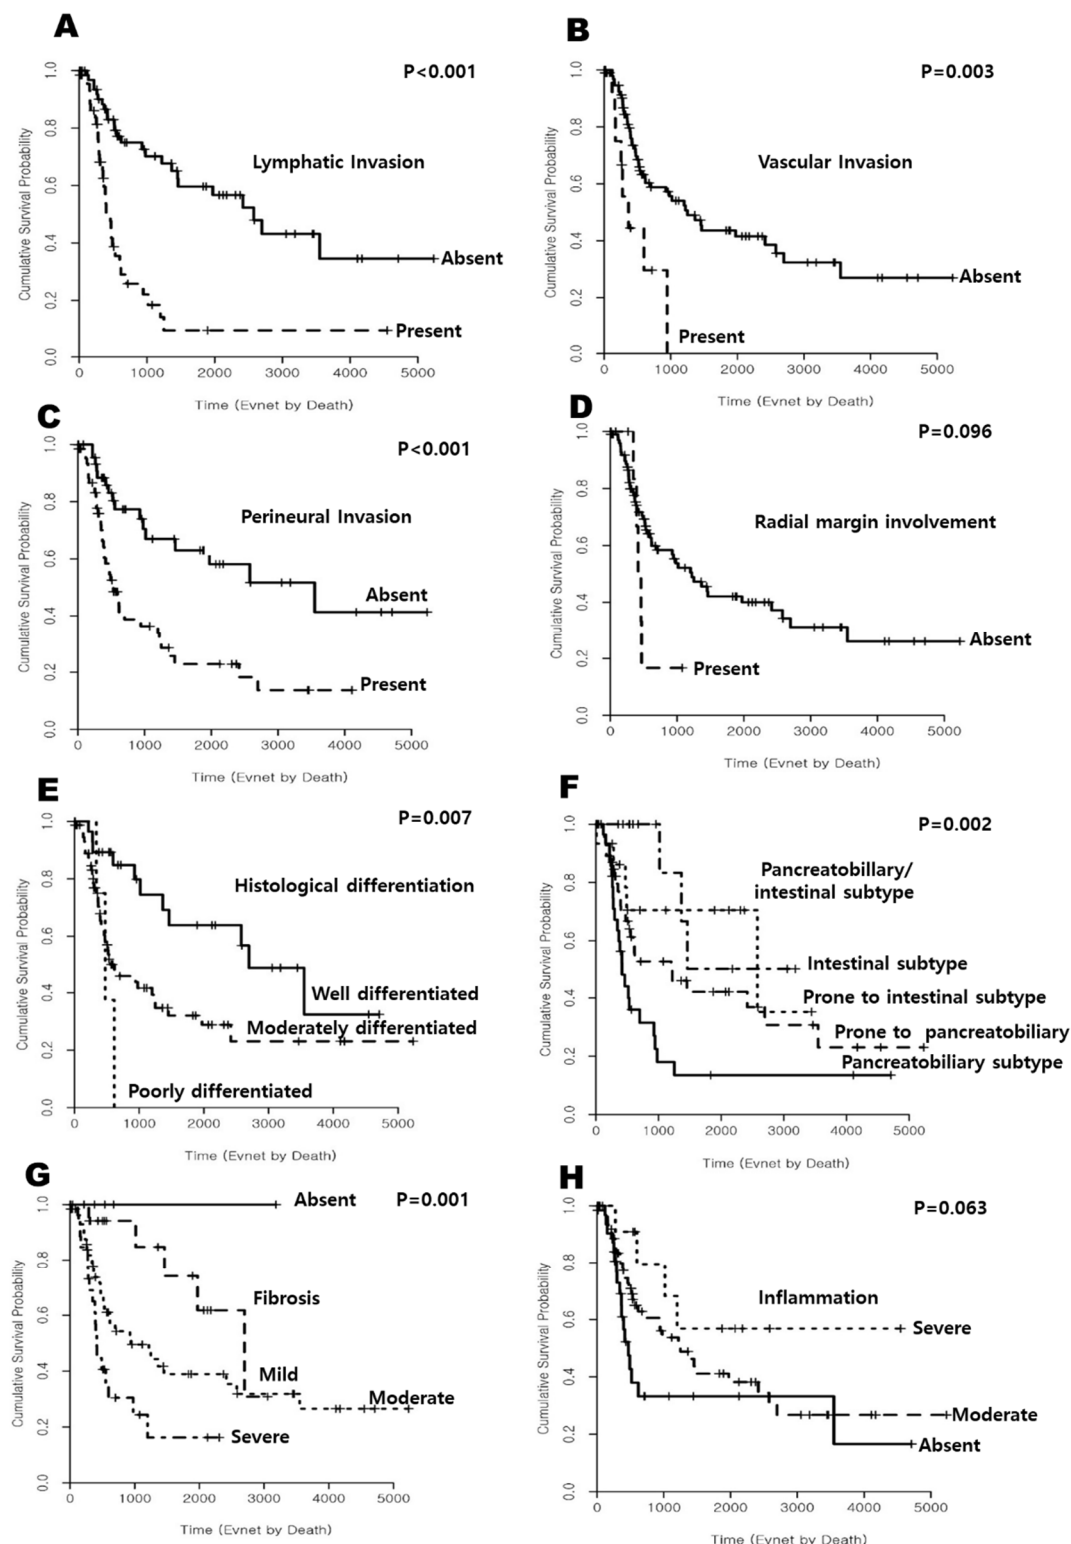

**Figure S3.** Kaplan-Meier plots on the relationship between overall survival and the pathological parameters in the periampullary/pancreatic cancers patients. There was significant relationship according to (A) lymphatic invasion, (B) vascular Invasion, (C) perineural invasion, (E) histological differentiation, (F) pancreatobiliary/intestinal type, and (G) fibrosis, while there was no significant difference according to (D) radial margin involvement, and (H) inflammation.

Figure S4.

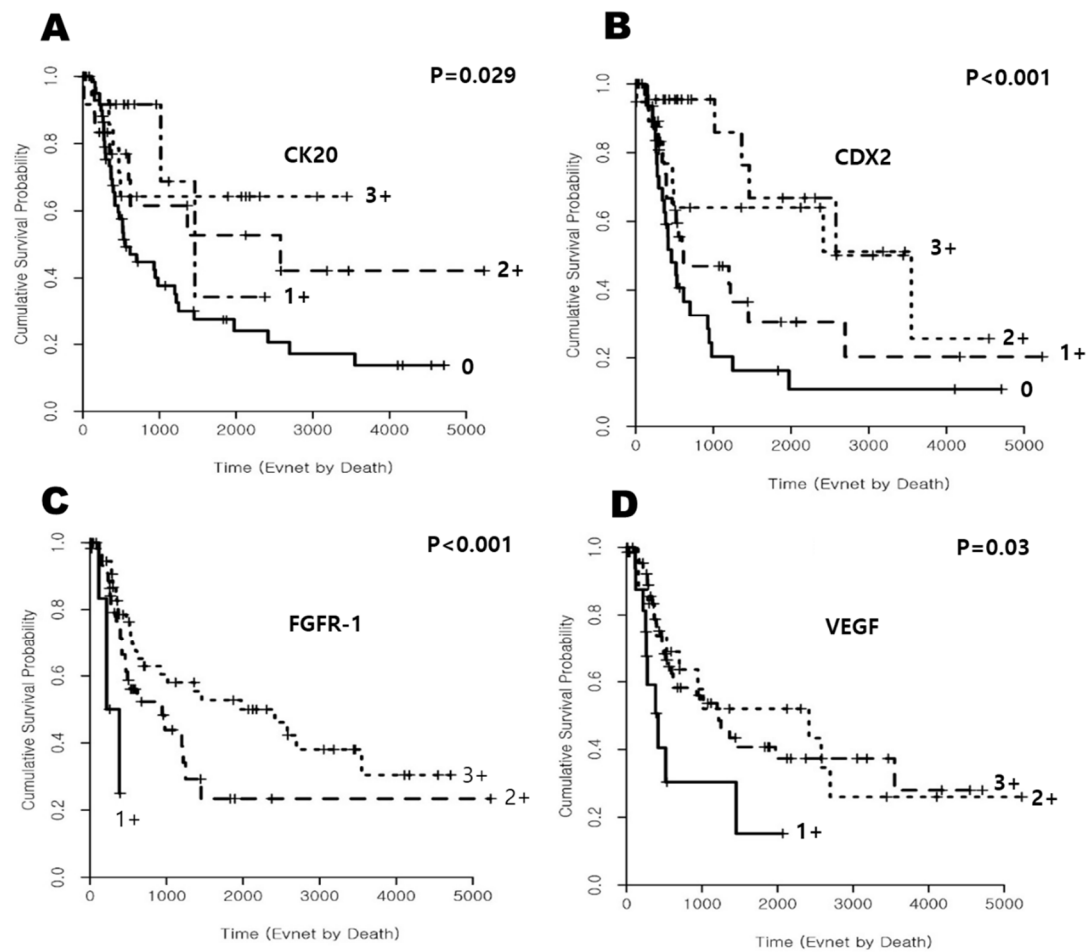

**Figure S4.** Kaplan-Meier plots survival analysis on the relationship between overall survival and expression level of the IHC markers in perianapillary/pancreatic cancer patients. There was significant relationship according to (A) CK20, (B) CDX2, (C) FGFR1, and (D) VEGF.

Figure S5.

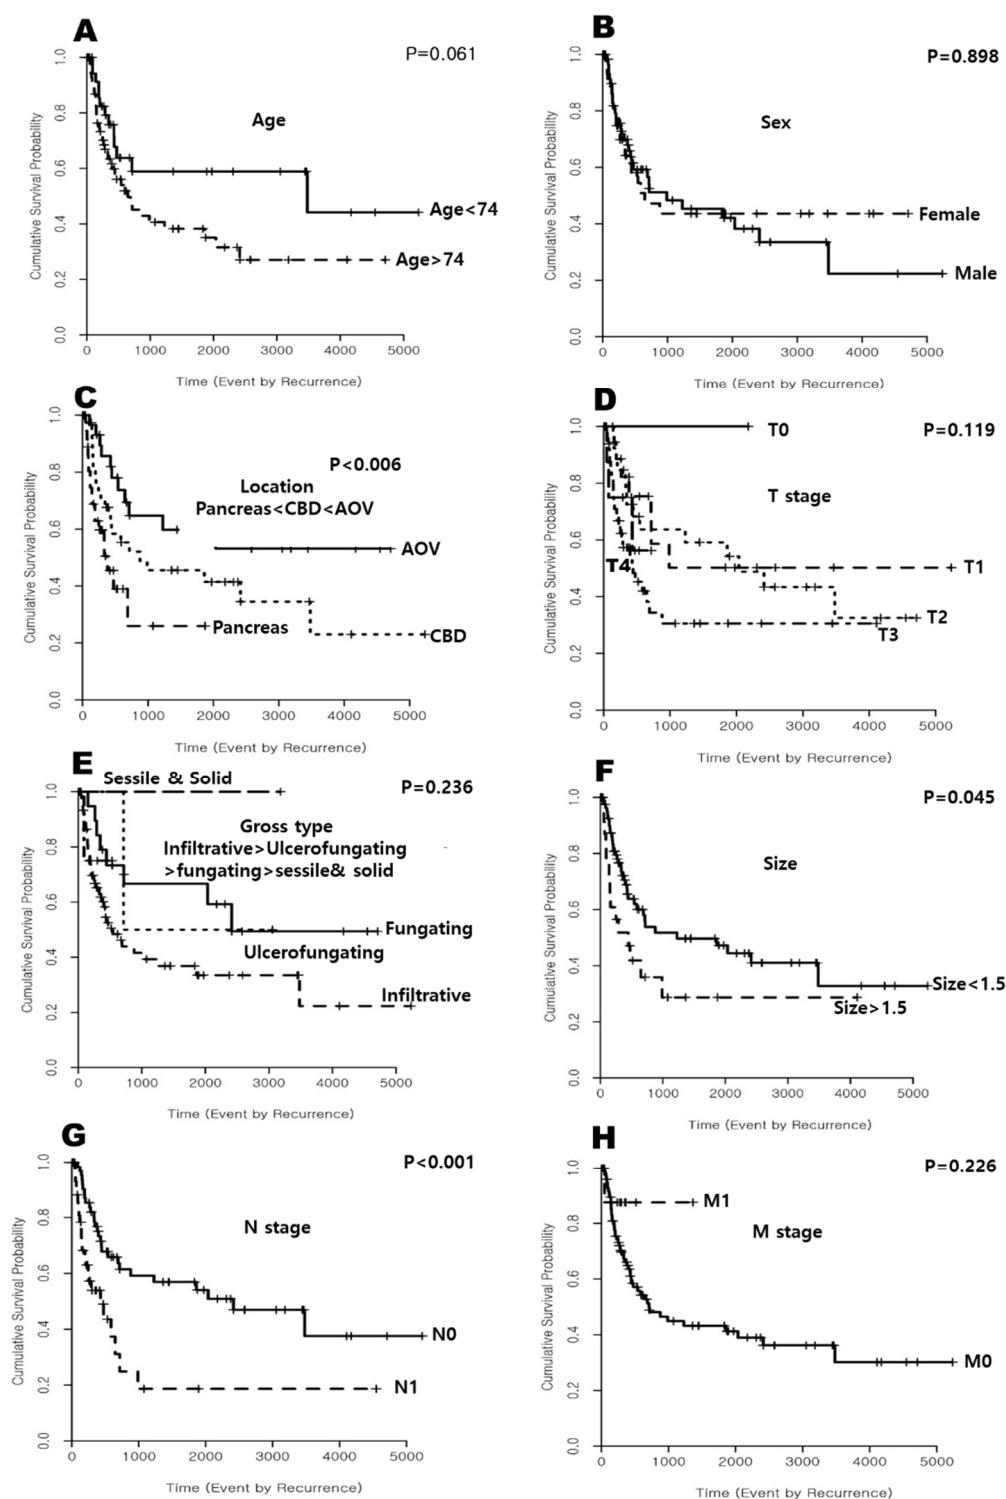

**Figure S5.** Kaplan-Meier plots on the relationship between disease free survival and clinical parameter in recurrent Periapulmonary/Pancreatic cancers patients. There was significant no relationship according to (A) age, (B) sex, (E) gross type, and M stage. While there was significant relationship according to, (C) location, (D) T stage, (F) Size, and (G) N stage.

Figure S6

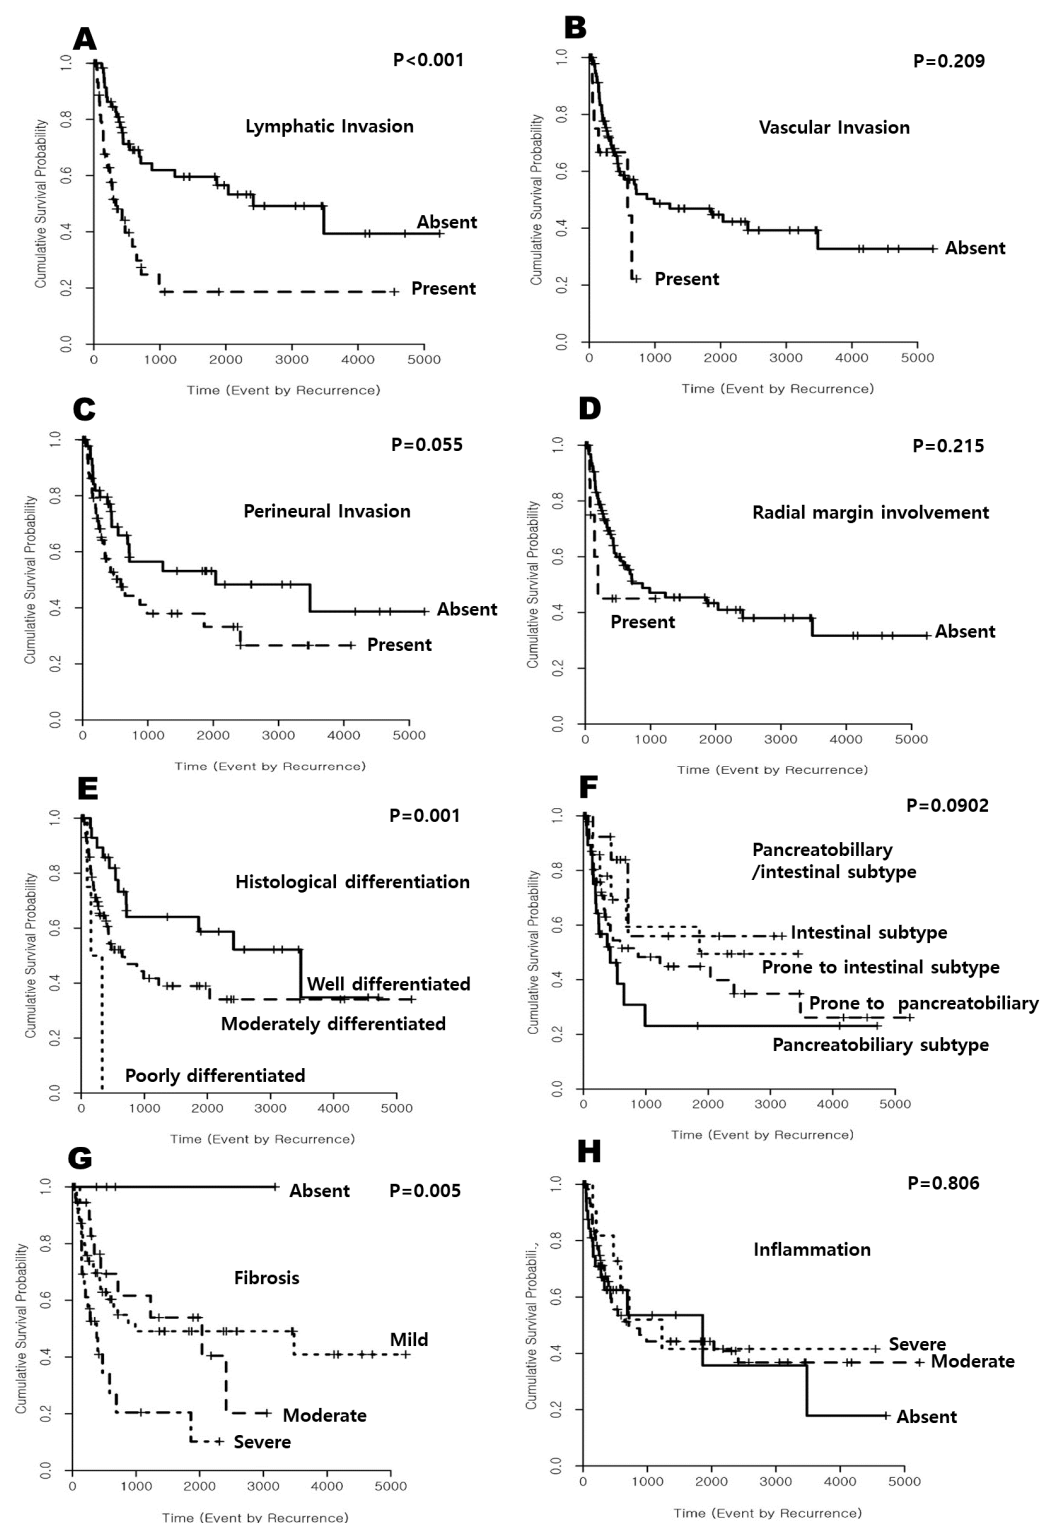

**Figure S6.** Kaplan-Meier plots on the relationship between disease free survival and pathological parameter in recurrent Periapillary/Pancreatic cancers patients. There was significant relationship according to (A) lymphatic invasion, (E) histological differentiation, and (G) fibrosis, whereas there was no significant difference according to (B) vascular Invasion, (C) perineural invasion, (D) radial margin involvement, (F) pancreatobiliary type vs intestinal type, and (H) inflammation.

Figure S7.

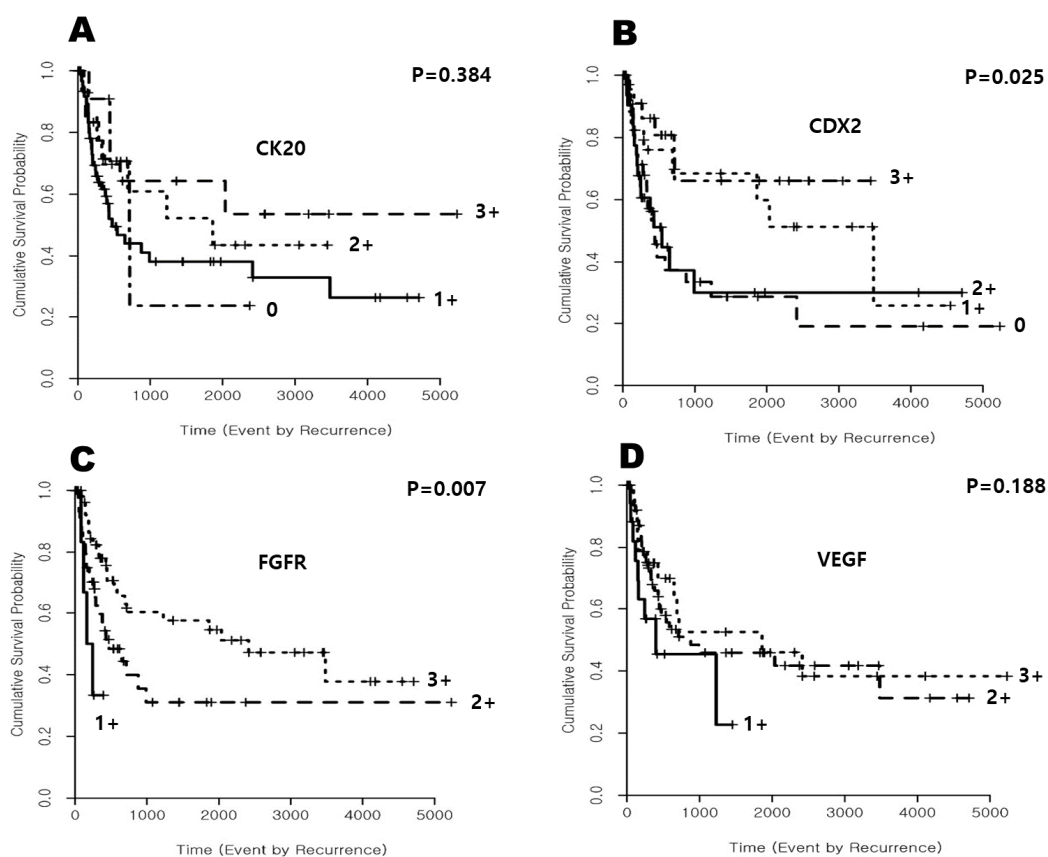

**Figure S7.** Kaplan-Meier plots on the relationship between disease free survival analysis and IHC markers expression level in recurrent Periapillary/Pancreatic cancers patients. There was significant relationship according to (A) CK20, (B) CDX2, (C) FGFR1, and whereas there was not significant difference according to (D) VEGF.
